# Supplementary material for: Effect of different levels of nitrogen on rhizosphere bacterial community structure in intensive monoculture of greenhouse lettuce
Source: PubMed Central journal article supplement (PMC4848521; doi:10.1038/srep25305), 2016-04-28
Supplement: srep25305-s1.pdf [file srep25305-s1.pdf]

## **Title page**

**Title:** Effect of different levels of nitrogen on rhizosphere bacterial community structure in intensive monoculture of greenhouse lettuce

**Author:** Jian-Gang Li<sup>1</sup>, Min-Chong Shen<sup>1,2</sup>, Jin-Feng Hou<sup>1,2</sup>, Ling Li<sup>1,2</sup>, Jun-Xia Wu<sup>1</sup>, Yuan-Hua Dong<sup>1\*</sup>

### **Affiliation:**

<sup>1</sup> Key Laboratory of Soil Environment and Pollution Remediation

Institute of Soil Science, Chinese Academy of Sciences

Nanjing, 210008, Jiangsu Province, P.R. China

<sup>2</sup> University of Chinese Academy of Sciences

Beijing, 100049, China

### **\* Corresponding author**

**E-mail:** yhdong@issas.ac.cn

**Tel:** +86-25-8688-1317

**Fax:** +86-25-8688-1317

**Table S1** Relative abundance of the identified main phylotypes in summer samples. Note: 100N: normal application rate of N, P<sub>2</sub>O<sub>5</sub>, and K<sub>2</sub>O was 185, 46, and 185 kg ha<sup>-1</sup>, respectively; 80N: 0.8 times N as in the 100N; 50N: 0.5 times N as in the 100N; CK: no N applied.

| Taxon            | CK1    | CK2    | CK3    | N501   | N502   | N503   | N801   | N802   | N803   | N1001  | N1002  | N1003  |
|------------------|--------|--------|--------|--------|--------|--------|--------|--------|--------|--------|--------|--------|
| Acidobacteria    | 0.0647 | 0.0697 | 0.0530 | 0.0245 | 0.0315 | 0.0155 | 0.0293 | 0.0635 | 0.0327 | 0.0464 | 0.0461 | 0.0492 |
| Actinobacteria   | 0.2284 | 0.1493 | 0.1017 | 0.0773 | 0.1003 | 0.1144 | 0.1507 | 0.1364 | 0.1120 | 0.1236 | 0.1357 | 0.1604 |
| Bacteroidetes    | 0.0476 | 0.0638 | 0.1019 | 0.0311 | 0.0296 | 0.0129 | 0.0092 | 0.0273 | 0.0118 | 0.0318 | 0.0347 | 0.0166 |
| Chloroflexi      | 0.0146 | 0.0176 | 0.0130 | 0.0053 | 0.0076 | 0.0051 | 0.0144 | 0.0233 | 0.0041 | 0.0095 | 0.0105 | 0.0119 |
| Firmicutes       | 0.2079 | 0.2890 | 0.2736 | 0.3723 | 0.3566 | 0.3601 | 0.4186 | 0.3690 | 0.4556 | 0.4536 | 0.4560 | 0.4078 |
| Gemmatimonadetes | 0.0183 | 0.0075 | 0.0009 | 0.0005 | 0.0041 | 0.0009 | 0.0034 | 0.0040 | 0.0025 | 0.0048 | 0.0076 | 0.0071 |
| Proteobacteria   | 0.2871 | 0.2454 | 0.2348 | 0.1780 | 0.1486 | 0.1502 | 0.1504 | 0.1959 | 0.1195 | 0.2162 | 0.2003 | 0.1743 |
| TM7              | 0.0138 | 0.0089 | 0.0151 | 0.0113 | 0.0091 | 0.0055 | 0.0059 | 0.0102 | 0.0115 | 0.0217 | 0.0110 | 0.0086 |
| Verrucomicrobia  | 0.0092 | 0.0161 | 0.0247 | 0.0168 | 0.0052 | 0.0039 | 0.0037 | 0.0105 | 0.0028 | 0.0089 | 0.0075 | 0.0059 |
| Armatimonadetes  | 0.0030 | 0.0021 | 0.0023 | 0.0004 | 0.0005 | 0.0003 | 0.0006 | 0.0023 | 0.0005 | 0.0006 | 0.0012 | 0.0006 |
| Chlamydiae       | 0.0032 | 0.0010 | 0.0023 | 0.0008 | 0.0005 | 0.0008 | 0.0005 | 0.0018 | 0.0007 | 0.0019 | 0.0010 | 0.0012 |
| Chlorobi         | 0.0009 | 0.0002 | 0.0002 | 0.0002 | 0.0002 | 0.0001 | 0.0000 | 0.0001 | 0.0004 | 0.0005 | 0.0004 | 0.0001 |
| Cyanobacteria    | 0.0093 | 0.0162 | 0.1080 | 0.0155 | 0.0119 | 0.0164 | 0.0064 | 0.0076 | 0.0098 | 0.0063 | 0.0108 | 0.0137 |
| Elusimicrobia    | 0.0003 | 0.0009 | 0.0012 | 0.0001 | 0.0002 | 0.0002 | 0.0000 | 0.0002 | 0.0001 | 0.0002 | 0.0005 | 0.0001 |
| Nitrospirae      | 0.0045 | 0.0059 | 0.0024 | 0.0007 | 0.0022 | 0.0019 | 0.0018 | 0.0023 | 0.0019 | 0.0032 | 0.0023 | 0.0024 |
| Planctomycetes   | 0.0053 | 0.0055 | 0.0077 | 0.0079 | 0.0052 | 0.0051 | 0.0052 | 0.0102 | 0.0023 | 0.0028 | 0.0052 | 0.0059 |
| WPS-2            | 0.0020 | 0.0020 | 0.0016 | 0.0034 | 0.0038 | 0.0026 | 0.0035 | 0.0030 | 0.0040 | 0.0035 | 0.0028 | 0.0037 |
| others           | 0.0798 | 0.0990 | 0.0556 | 0.2540 | 0.2831 | 0.3042 | 0.1964 | 0.1324 | 0.2279 | 0.0645 | 0.0663 | 0.1306 |

**Table S2** Relative abundance of the identified main phylotypes in cwinter samples. Note: 100N: normal application rate of N, P<sub>2</sub>O<sub>5</sub>, and K<sub>2</sub>O was 185, 46, and 185 kg ha<sup>-1</sup>, respectively; 80N: 0.8 times N a as in the 100N; 50N: 0.5 times N as in the 100N; CK: no N applied.

| Taxon            | CK1    | CK2    | CK3    | N501   | N502   | N503   | N801   | N802   | N803   | N1001  | N1002  | N1003  |
|------------------|--------|--------|--------|--------|--------|--------|--------|--------|--------|--------|--------|--------|
| Acidobacteria    | 0.1140 | 0.1440 | 0.1332 | 0.0560 | 0.0739 | 0.0980 | 0.0683 | 0.0741 | 0.0606 | 0.0606 | 0.0666 | 0.0496 |
| Actinobacteria   | 0.1090 | 0.1203 | 0.1004 | 0.0778 | 0.0944 | 0.0841 | 0.0418 | 0.0605 | 0.0736 | 0.1084 | 0.0145 | 0.0608 |
| Bacteroidetes    | 0.0840 | 0.0583 | 0.0681 | 0.1498 | 0.0997 | 0.1206 | 0.1166 | 0.1021 | 0.1158 | 0.1301 | 0.1711 | 0.1566 |
| Chloroflexi      | 0.0241 | 0.0615 | 0.0269 | 0.0084 | 0.0303 | 0.0109 | 0.0281 | 0.0078 | 0.0083 | 0.0076 | 0.0024 | 0.0099 |
| Firmicutes       | 0.1445 | 0.1104 | 0.1436 | 0.1107 | 0.1308 | 0.1444 | 0.1901 | 0.2019 | 0.2426 | 0.0846 | 0.0941 | 0.1102 |
| Gemmatimonadetes | 0.0356 | 0.0659 | 0.0352 | 0.0107 | 0.0473 | 0.0101 | 0.0024 | 0.0048 | 0.0036 | 0.0166 | 0.0011 | 0.0038 |
| Proteobacteria   | 0.3382 | 0.3578 | 0.3134 | 0.4183 | 0.3967 | 0.3851 | 0.2936 | 0.3146 | 0.2915 | 0.3101 | 0.2826 | 0.3069 |
| TM7              | 0.0098 | 0.0101 | 0.0079 | 0.0130 | 0.0263 | 0.0186 | 0.0154 | 0.0284 | 0.0231 | 0.0162 | 0.0485 | 0.0204 |
| Verrucomicrobia  | 0.0246 | 0.0178 | 0.0278 | 0.0292 | 0.0120 | 0.0212 | 0.0273 | 0.0169 | 0.0254 | 0.0160 | 0.0142 | 0.0475 |
| Armatimonadetes  | 0.0026 | 0.0033 | 0.0035 | 0.0018 | 0.0016 | 0.0025 | 0.0012 | 0.0014 | 0.0021 | 0.0024 | 0.0002 | 0.0015 |
| Chlamydiae       | 0.0017 | 0.0012 | 0.0019 | 0.0015 | 0.0009 | 0.0023 | 0.0020 | 0.0028 | 0.0029 | 0.0015 | 0.0039 | 0.0013 |
| Chlorobi         | 0.0010 | 0.0010 | 0.0012 | 0.0009 | 0.0007 | 0.0010 | 0.0025 | 0.0013 | 0.0010 | 0.0009 | 0.0005 | 0.0005 |
| Cyanobacteria    | 0.0161 | 0.0131 | 0.0620 | 0.0110 | 0.0289 | 0.0783 | 0.0556 | 0.0746 | 0.0386 | 0.1382 | 0.2495 | 0.1492 |
| Elusimicrobia    | 0.0015 | 0.0011 | 0.0011 | 0.0004 | 0.0003 | 0.0010 | 0.0010 | 0.0005 | 0.0017 | 0.0009 | 0.0002 | 0.0009 |
| Fibrobacteres    | 0.0006 | 0.0005 | 0.0010 | 0.0005 | 0.0007 | 0.0004 | 0.0005 | 0.0003 | 0.0004 | 0.0009 | 0.0022 | 0.0008 |
| Nitrospirae      | 0.0083 | 0.0057 | 0.0071 | 0.0038 | 0.0032 | 0.0033 | 0.0125 | 0.0011 | 0.0033 | 0.0039 | 0.0008 | 0.0020 |
| OD1              | 0.0013 | 0.0009 | 0.0020 | 0.0021 | 0.0014 | 0.0018 | 0.0010 | 0.0024 | 0.0029 | 0.0022 | 0.0025 | 0.0023 |
| Planctomycetes   | 0.0055 | 0.0089 | 0.0087 | 0.0059 | 0.0130 | 0.0037 | 0.0038 | 0.0105 | 0.0078 | 0.0067 | 0.0019 | 0.0084 |
| WPS-2            | 0.0009 | 0.0017 | 0.0011 | 0.0013 | 0.0053 | 0.0018 | 0.0017 | 0.0049 | 0.0017 | 0.0018 | 0.0011 | 0.0012 |
| others           | 0.0769 | 0.0164 | 0.0540 | 0.0966 | 0.0329 | 0.0109 | 0.1344 | 0.0894 | 0.0934 | 0.0905 | 0.0422 | 0.0663 |

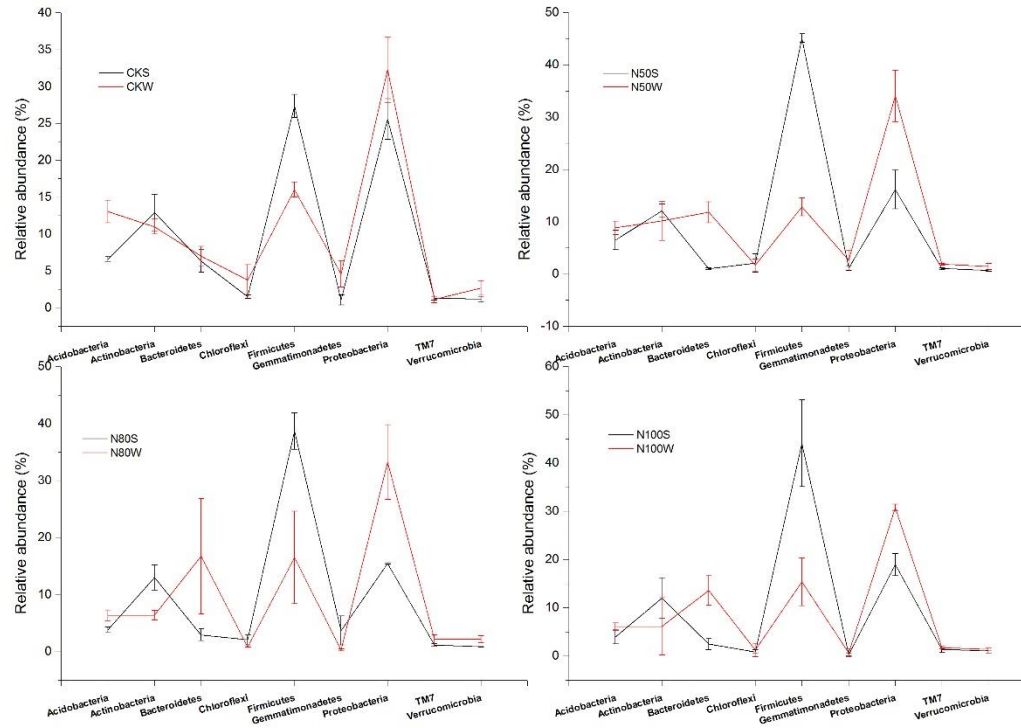

Figure S1. The relative abundance of dominant phyla in the same treatments of summer (S) and winter (W) samples. 100N: normal application rate of N, P<sub>2</sub>O<sub>5</sub>, and K<sub>2</sub>O was 185, 46, and 185 kg ha<sup>-1</sup>, respectively; 80N: 0.8 times N as in the 100N; 50N: 0.5 times N as in the 100N; CK: no N applied.
